# Supplementary material for: Exploring the Model of Cefazolin Released from Jellyfish Gelatin-Based Hydrogels as Affected by Glutaraldehyde
Source: MDPI journal article supplement (doi:10.3390/gels10040271), 2024-04-17
Supplement: s1 [file s1]

**Table S1.** Peak wavenumbers of commercial gelatin and jellyfish by-product gelatin with different parts of jellyfish and extraction times.

| Region    | Peak wavenumber (cm <sup>-1</sup> ) |         |         |         |         |         |
|-----------|-------------------------------------|---------|---------|---------|---------|---------|
|           | BG                                  | FG      | WU24    | WO24    | WU48    | WO48    |
| Amide A   | 3438.65                             | 3424.21 | 3353.99 | 3412.81 | 3422.64 | 3403.23 |
| Amide B   | 2918.86                             | 2927.48 | 2930.04 | 2923.03 | 2928.30 | 2928.45 |
| Amide I   | 1607.43                             | 1619.56 | 1626.89 | 1628.54 | 1630.84 | 1630.72 |
| Amide II  | 1561.36                             | 1567.14 | 1558.84 | 1559.08 | 1555.08 | 1550.02 |
| Amide III | 1240.08                             | 1239.84 | 1239.29 | 1238.63 | 1229.95 | 1229.07 |

**Table S2.** Comparison of secondary structure from the band of amide I (1600-1700 cm<sup>-1</sup>).

| Sample | $\beta$ -sheet (%) | Random coil (%) | $\alpha$ -helix (%) | $\beta$ -turn (%) |
|--------|--------------------|-----------------|---------------------|-------------------|
| BG     | 30.26              | 22.95           | 0.47                | 46.33             |
| FG     | 10.99              | 6.09            | 9.06                | 73.87             |
| WU24   | 4.24               | 11.81           | 31.62               | 52.34             |
| WO24   | 5.86               | 58.41           | 3.75                | 31.98             |
| WU48   | 15.85              | 26.60           | 24.90               | 32.65             |
| WO48   | 29.89              | 49.48           | 16.77               | 3.85              |

**Table S3.** Protein names and sequence of commercial gelatins (bovine, BG; and fish, FG) and jellyfish by-product gelatin with different parts of jellyfish and extraction times.

| Protein names                    | Peptide sequences        | BG | FG | WU24 | WO24 | WU48 | WO48 |
|----------------------------------|--------------------------|----|----|------|------|------|------|
| Collagen alpha-1(XXI) chain      | PGDSGEPGDKG              | +  | +  | +    | +    | +    | +    |
| Collagen alpha-1(XXIV) chain     | DCQREISD                 | +  | +  |      | +    |      |      |
| Collagen alpha-1(XXVII) chain B  | GGKGGAGR                 | +  | +  | +    | +    |      | +    |
| Collagen alpha-1(II) chain       | AKGSAGAP                 | +  | +  | +    | +    | +    | +    |
| Collagen alpha-1(XI) chain A     | DGEPGEKGEDGESGQ          | +  | +  | +    | +    |      |      |
| Collagen alpha-1(XXII) chain     | QAGAQGEP                 | +  | +  | +    |      |      |      |
| Collagen alpha-1(XXVIII) chain B | GEPGLTVSCGECIS           | +  | +  | +    | +    |      |      |
| Collagen alpha-1(IX) chain A     | GEAGPSGG                 | +  | +  | +    | +    |      |      |
| Collagen alpha-1(XII) chain      | HVFEVEDF                 | +  | +  |      | +    |      |      |
| Collagen alpha-1(I) chain B      | AAGATGFP                 | +  | +  | +    | +    |      |      |
| Collagen alpha-1(VII) chain      | ACGGSGPD                 | +  | +  | +    | +    | +    | +    |
| Collagen alpha-1(IV) chain       | GMPGKDGEFG               | +  | +  | +    |      | +    |      |
| Collagen alpha-1(I) chain A      | DGDVGAPGASGP             | +  |    | +    |      |      |      |
| Collagen alpha-1(XXVIII) chain A | GPAGPSGMQGF              | +  | +  | +    | +    | +    | +    |
| Collagen alpha-1(XI) chain       | EEDSYYYEYPYDDADAK PLEPTT | +  | +  | +    | +    |      |      |
| Collagen alpha-1(XVI) chain      | LYVTYSHGADAGEQ           | +  | +  | +    | +    | +    | +    |
| Collagen alpha-1(I) chain        | AGAAGPAQGDP              | +  |    | +    |      |      |      |
| Collagen alpha-1(XVIII) chain A  | PGHPGHSS                 | +  | +  |      |      |      |      |
| Collagen alpha-2(I) chain        | GDPGPPGL                 | +  | +  | +    | +    | +    | +    |
| Collagen alpha-2(V) chain-like   | GFPGSPGG                 | +  |    |      |      |      | +    |
| Collagen alpha-2(VIII) chain     | LPCGGWNCECAF             | +  |    |      |      |      |      |
| Collagen alpha-2(IX) chain       | VGKPGGKG                 | +  | +  | +    | +    | +    | +    |
| Collagen alpha-2(XI) chain       | GPPGPPGKRGPPGT           | +  | +  | +    | +    | +    |      |
| Collagen alpha-3(VI) chain       | GARGYNGE                 | +  | +  |      |      |      |      |
| Collagen alpha-4(IV) chain-like  | GPPGPPGTCGEH             | +  | +  | +    |      | +    |      |
| Collagen alpha-5(IV) chain       | GLPGFPGTP                | +  | +  | +    |      | +    | +    |
| Collagen alpha-6(VI) chain       | KFVKAFISSV               | +  |    | +    |      |      |      |
| Collagen alpha-6(IV) chain       | GFCACDGG                 | +  | +  | +    |      |      |      |

“+” stands for the existence of peptide.

**Table S4.** Gel swelling of bovine hydrogels.

| Sample     | Gel swelling* (%)       |                          |                          |                          |                          |                          |                           |                           |
|------------|-------------------------|--------------------------|--------------------------|--------------------------|--------------------------|--------------------------|---------------------------|---------------------------|
|            | 0 h                     | 1 h                      | 2 h                      | 4 h                      | 6 h                      | 8 h                      | 24 h                      | 48 h                      |
| BGel0.25** | 1.02±0.02 <sup>Hb</sup> | 22.24±0.76 <sup>Ga</sup> | 45.76±0.65 <sup>Fa</sup> | 57.30±0.56 <sup>Ea</sup> | 76.83±0.38 <sup>Da</sup> | 95.60±0.57 <sup>Ca</sup> | 150.03±0.68 <sup>Ba</sup> | 166.53±0.45 <sup>Aa</sup> |
| BGel0.50** | 1.08±0.02 <sup>Ha</sup> | 11.48±0.50 <sup>Gb</sup> | 19.38±0.73 <sup>Fb</sup> | 21.98±0.93 <sup>Eb</sup> | 34.05±0.90 <sup>Db</sup> | 47.27±0.64 <sup>Cb</sup> | 75.28±0.76 <sup>Bb</sup>  | 82.33±0.57 <sup>Ab</sup>  |
| BGel1.00** | 1.07±0.01 <sup>Ha</sup> | 2.36±0.30 <sup>Gc</sup>  | 4.59±0.57 <sup>Fc</sup>  | 6.68±0.24 <sup>Ec</sup>  | 9.27±0.17 <sup>Dc</sup>  | 11.95±0.22 <sup>Cc</sup> | 25.91±0.52 <sup>Bc</sup>  | 29.71±0.64 <sup>Ac</sup>  |

\*Different superscripts (A-H) in the same column indicate a significant difference (p<0.05).

\*\*Different superscripts (a-c) in the same row indicate a significant difference (p<0.05).

**Table S5.** Gel swelling of fish hydrogels.

| Sample     | Gel swelling* (%)       |                          |                          |                          |                          |                           |                           |                           |
|------------|-------------------------|--------------------------|--------------------------|--------------------------|--------------------------|---------------------------|---------------------------|---------------------------|
|            | 0 h                     | 1 h                      | 2 h                      | 4 h                      | 6 h                      | 8 h                       | 24 h                      | 48 h                      |
| FGel0.25** | 1.07±0.02 <sup>Ha</sup> | 30.04±1.72 <sup>Ga</sup> | 50.94±0.75 <sup>Fa</sup> | 71.43±0.48 <sup>Ea</sup> | 87.49±0.94 <sup>Da</sup> | 100.05±0.42 <sup>Ca</sup> | 155.00±0.65 <sup>Ba</sup> | 171.15±0.59 <sup>Aa</sup> |
| FGel0.50** | 1.05±0.01 <sup>Hb</sup> | 12.04±0.84 <sup>Gb</sup> | 23.17±0.92 <sup>Fb</sup> | 25.67±0.43 <sup>Eb</sup> | 43.56±0.46 <sup>Db</sup> | 59.53±0.65 <sup>Cb</sup>  | 83.32±0.55 <sup>Bb</sup>  | 89.90±0.58 <sup>Ab</sup>  |
| FGel1.00** | 1.07±0.01 <sup>Ha</sup> | 3.78±0.63 <sup>Gc</sup>  | 5.91±0.40 <sup>Fc</sup>  | 7.83±0.89 <sup>Ec</sup>  | 10.27±0.40 <sup>Dc</sup> | 14.07±0.48 <sup>Cc</sup>  | 31.13±0.29 <sup>Bc</sup>  | 34.64±0.64 <sup>Ac</sup>  |

\*Different superscripts (A-H) in the same column indicate a significant difference (p<0.05).

\*\*Different superscripts (a-c) in the same row indicate a significant difference (p<0.05).

**Table S6.** Gel swelling of jellyfish hydrogels.

| Sample     | Gel swelling* (%)       |                          |                          |                          |                          |                           |                           |                           |
|------------|-------------------------|--------------------------|--------------------------|--------------------------|--------------------------|---------------------------|---------------------------|---------------------------|
|            | 0 h                     | 1 h                      | 2 h                      | 4 h                      | 6 h                      | 8 h                       | 24 h                      | 48 h                      |
| JGel0.25** | 1.03±0.01 <sup>Hb</sup> | 34.10±0.77 <sup>Ga</sup> | 54.43±0.65 <sup>Fa</sup> | 72.90±0.53 <sup>Ea</sup> | 94.50±0.45 <sup>Da</sup> | 104.05±0.72 <sup>Ca</sup> | 165.74±0.31 <sup>Ba</sup> | 174.06±0.63 <sup>Aa</sup> |
| JGel0.50** | 1.03±0.01 <sup>Hb</sup> | 12.80±0.48 <sup>Gb</sup> | 26.38±0.58 <sup>Fb</sup> | 29.78±0.38 <sup>Eb</sup> | 45.99±0.24 <sup>Db</sup> | 65.08±0.74 <sup>Cb</sup>  | 93.49±0.69 <sup>Bb</sup>  | 95.30±0.57 <sup>Ab</sup>  |
| JGel1.00** | 1.09±0.01 <sup>Ha</sup> | 3.82±0.71 <sup>Gc</sup>  | 6.74±0.80 <sup>Fc</sup>  | 8.28±0.29 <sup>Ec</sup>  | 11.25±0.50 <sup>Dc</sup> | 18.04±0.66 <sup>Cc</sup>  | 36.00±0.11 <sup>Bc</sup>  | 38.47±0.10 <sup>Ac</sup>  |

\*Different superscripts (A-H) in the same column indicate a significant difference (p<0.05).

\*\*Different superscripts (a-c) in the same row indicate a significant difference (p<0.05).

**Table S7.** Cumulative percentage release of bovine hydrogels.

| Time (h) | The cumulative percentage release* (%) |                          |                          |
|----------|----------------------------------------|--------------------------|--------------------------|
|          | BGel0.25                               | BGel0.50                 | BGel1.00                 |
| 1**      | 25.98±0.65 <sup>Ia</sup>               | 25.61±0.24 <sup>Ia</sup> | 13.10±0.86 <sup>Ib</sup> |
| 2**      | 31.75±0.43 <sup>Ia</sup>               | 27.83±0.33 <sup>Hb</sup> | 18.75±0.17 <sup>Hc</sup> |
| 3**      | 37.32±0.53 <sup>Ha</sup>               | 31.68±1.26 <sup>Gb</sup> | 20.40±0.58 <sup>Gc</sup> |
| 4**      | 39.69±0.09 <sup>Ga</sup>               | 37.30±1.35 <sup>Fb</sup> | 24.53±0.80 <sup>Fc</sup> |
| 5**      | 44.01±0.57 <sup>Fa</sup>               | 38.72±0.32 <sup>Fb</sup> | 28.59±0.53 <sup>Ec</sup> |
| 6**      | 47.19±0.69 <sup>Ea</sup>               | 41.23±0.29 <sup>Eb</sup> | 30.57±0.26 <sup>Dc</sup> |
| 7**      | 49.53±0.99 <sup>Da</sup>               | 44.05±0.60 <sup>Db</sup> | 34.18±0.45 <sup>Cc</sup> |
| 8**      | 52.82±0.15 <sup>Ca</sup>               | 49.45±1.26 <sup>Cb</sup> | 35.65±0.23 <sup>Bc</sup> |
| 24**     | 58.93±0.75 <sup>Ba</sup>               | 56.30±1.78 <sup>Bb</sup> | 36.52±0.50 <sup>Bc</sup> |
| 48**     | 62.25±2.23 <sup>Aa</sup>               | 60.64±0.22 <sup>Aa</sup> | 39.94±0.65 <sup>Ab</sup> |

\*Different superscripts (A-J) in the same column indicate a significant difference (p<0.05).

\*\*Different superscripts (a-c) in the same row indicate a significant difference (p<0.05).

**Table S8.** Cumulative percentage release of fish hydrogels.

| Time (h) | The cumulative percentage release* (%) |                          |                          |
|----------|----------------------------------------|--------------------------|--------------------------|
|          | FGel0.25                               | FGel0.50                 | FGel1.00                 |
| 1**      | 33.34±2.04 <sup>Ha</sup>               | 22.75±0.98 <sup>Ib</sup> | 20.12±0.16 <sup>Jc</sup> |
| 2**      | 38.73±1.65 <sup>Ga</sup>               | 31.10±0.43 <sup>Hb</sup> | 25.49±1.61 <sup>Ic</sup> |
| 3**      | 40.30±0.14 <sup>Ga</sup>               | 32.60±0.94 <sup>Hb</sup> | 29.05±0.58 <sup>Hc</sup> |
| 4**      | 44.25±0.55 <sup>Fa</sup>               | 39.87±1.58 <sup>Gb</sup> | 31.42±0.30 <sup>Gc</sup> |
| 5**      | 46.15±0.93 <sup>Ea</sup>               | 46.15±1.08 <sup>Fa</sup> | 33.96±0.61 <sup>Fb</sup> |
| 6**      | 48.09±0.32 <sup>Da</sup>               | 48.48±0.63 <sup>Ea</sup> | 35.70±0.52 <sup>Eb</sup> |
| 7**      | 49.78±0.46 <sup>Da</sup>               | 50.73±0.91 <sup>Da</sup> | 38.66±0.68 <sup>Db</sup> |
| 8**      | 54.05±0.38 <sup>Ca</sup>               | 52.73±0.84 <sup>Cb</sup> | 41.30±0.08 <sup>Cc</sup> |
| 24**     | 58.41±0.98 <sup>Ba</sup>               | 57.71±0.27 <sup>Ba</sup> | 44.84±0.51 <sup>Bb</sup> |
| 48**     | 67.24±0.94 <sup>Aa</sup>               | 64.55±0.38 <sup>Ab</sup> | 47.52±0.86 <sup>Ac</sup> |

\*Different superscripts (A-J) in the same column indicate a significant difference (p<0.05).

\*\*Different superscripts (a-c) in the same row indicate a significant difference (p<0.05).

**Table S9.** Cumulative percentage release of jellyfish hydrogels.

| Time (h) | The cumulative percentage release* (%) |                          |                            |
|----------|----------------------------------------|--------------------------|----------------------------|
|          | JGel0.25                               | JGel0.50                 | JGel1.00                   |
| 1**      | 27.89±1.30 <sup>Ia</sup>               | 24.37±2.24 <sup>Ia</sup> | 18.28±4.31 <sup>Gb</sup>   |
| 2**      | 55.62±0.82 <sup>Ha</sup>               | 48.86±2.12 <sup>Hb</sup> | 34.01±2.83 <sup>Fc</sup>   |
| 3**      | 65.32±3.15 <sup>Ga</sup>               | 57.71±1.11 <sup>Gb</sup> | 37.95±0.12 <sup>Ec</sup>   |
| 4**      | 70.33±1.58 <sup>Fa</sup>               | 64.32±1.82 <sup>Fb</sup> | 38.47±0.33 <sup>DEc</sup>  |
| 5**      | 72.90±1.00 <sup>Ea</sup>               | 68.05±0.44 <sup>Eb</sup> | 40.37±0.62 <sup>CDEc</sup> |
| 6**      | 76.71±1.62 <sup>Da</sup>               | 70.71±1.90 <sup>Db</sup> | 41.28±0.35 <sup>CDc</sup>  |
| 7**      | 79.35±0.24 <sup>Ca</sup>               | 75.00±1.00 <sup>Cb</sup> | 42.23±0.82 <sup>BCc</sup>  |
| 8**      | 86.77±0.89 <sup>Ba</sup>               | 80.26±0.62 <sup>Bb</sup> | 43.44±0.45 <sup>BCc</sup>  |
| 24**     | 88.82±0.34 <sup>Ba</sup>               | 85.65±0.90 <sup>Ab</sup> | 45.15±0.79 <sup>Bc</sup>   |
| 48**     | 91.50±0.33 <sup>Aa</sup>               | 87.09±0.83 <sup>Ab</sup> | 50.19±1.25 <sup>Ac</sup>   |

\*Different superscripts (A-I) in the same column indicate a significant difference (p<0.05).

\*\*Different superscripts (a-c) in the same row indicate a significant difference (p<0.05).

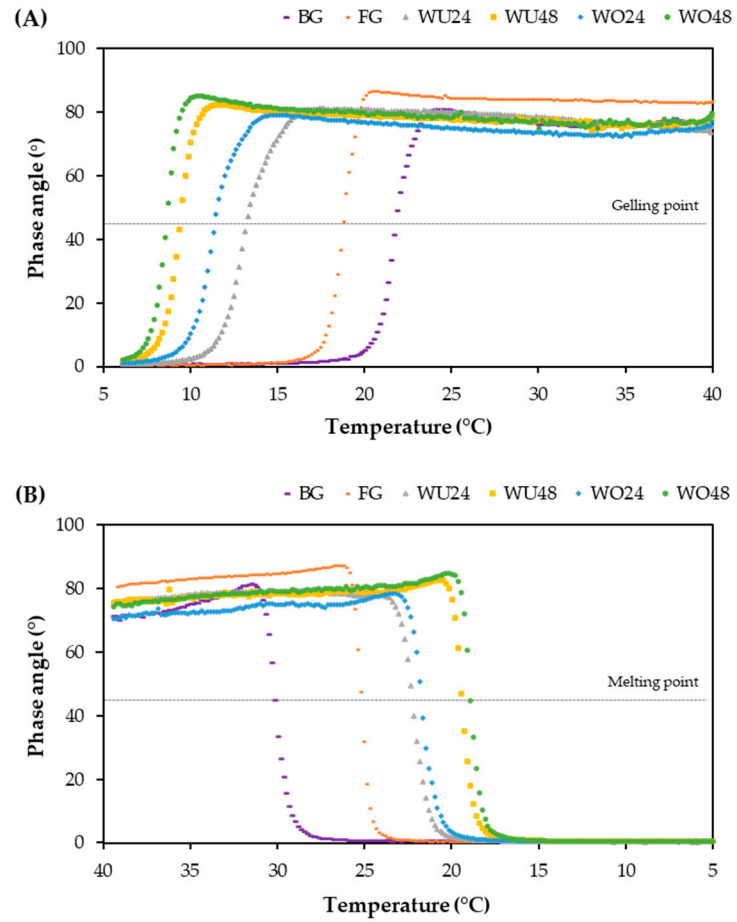

**Figure S1.** Dynamic viscoelastic profile changes in commercial gelatins (bovine, BG; and fish, FG) and jellyfish by-product gelatins during gelling and melting (A) during gelling and (B) during melting.

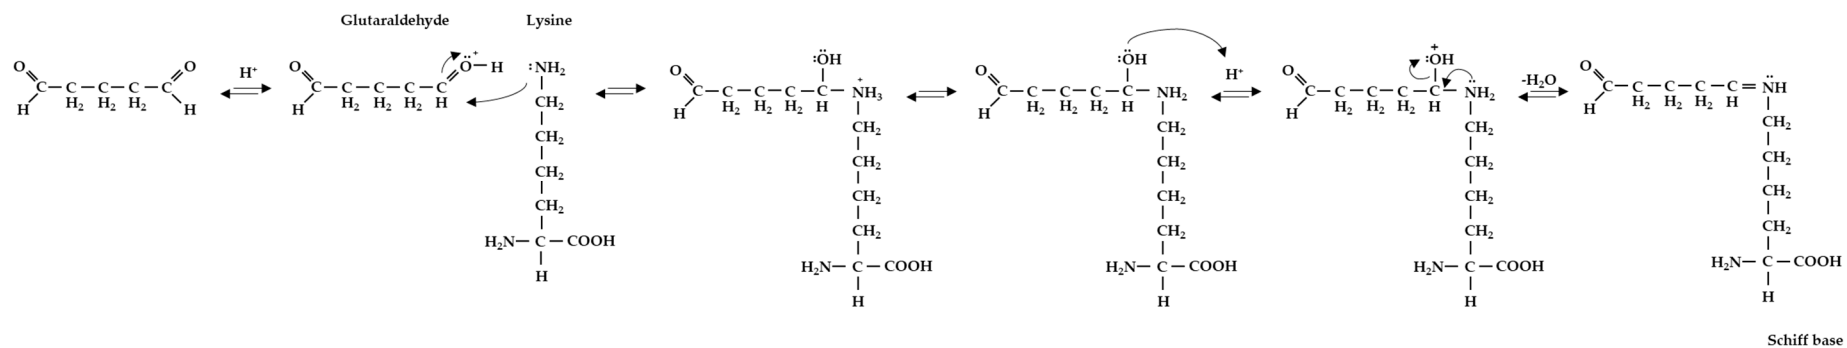

**Figure S2.** Schiff base linkages are created by a reaction between the amino group of lysine and the carbonyl groups of glutaraldehyde.



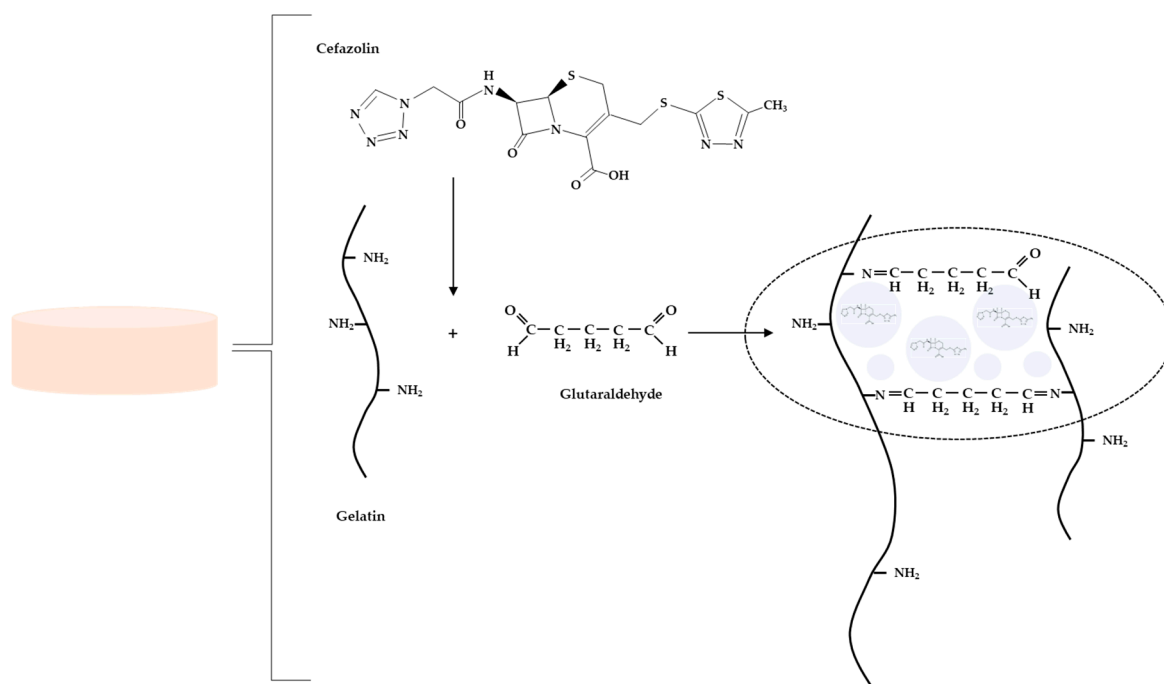

**Figure S3.** Adsorption of cefazolin solution in hydrogels.

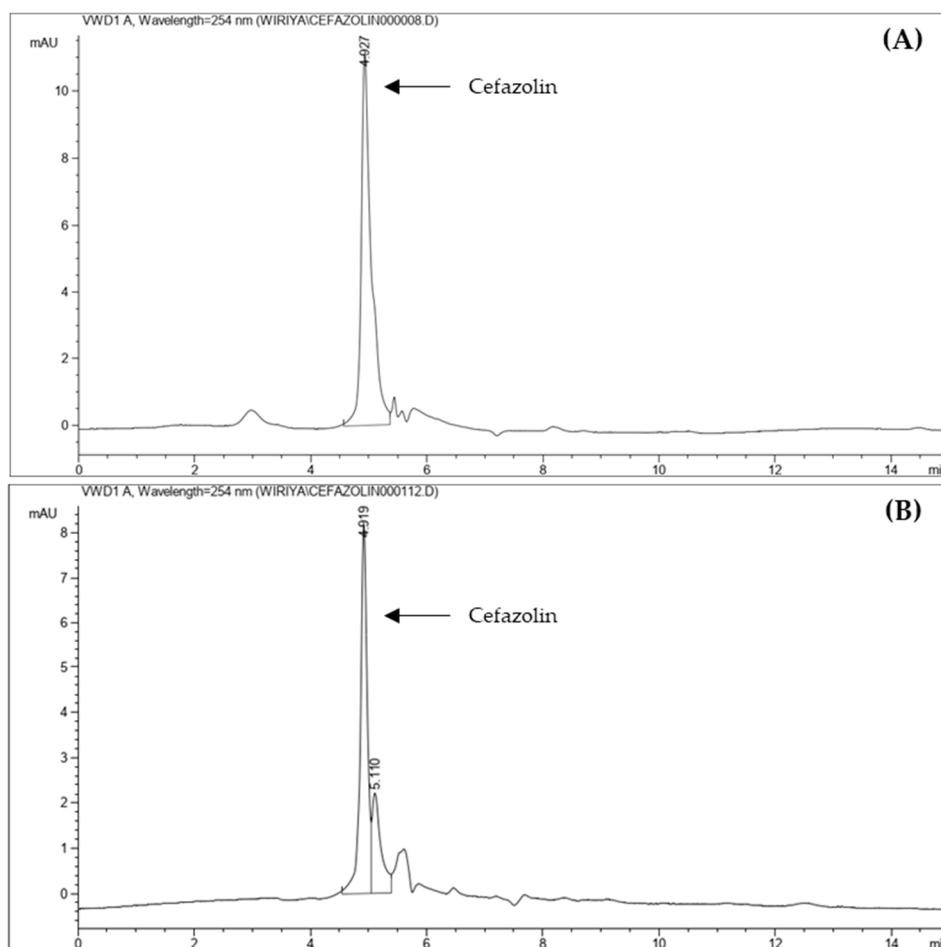

**Figure S4.** HPLC chromatogram of cefazolin at 100 ppm (A) and release of cefazolin in the jellyfish hydrogel (JGel0.25; 10: 0.25 (v/v)) for 8 h (B).
